# Supplementary material for: Development of Personalized Therapeutic Strategies by Targeting Actionable Vulnerabilities in Metastatic and Chemotherapy-Resistant Breast Cancer PDXs
Source: MDPI journal article supplement (doi:10.3390/cells8060605), 2019-06-18
Supplement: s1 [file s1]

**Table S1. Patients' tumors transplanted in mice and corresponding positivity of engraftment.** For each patient with metastatic breast cancer (MBC) site of metastasis, year of surgery and molecular subtype (LB: Luminal B; TN: Triple Negative; HER2+: HER2 positive) is reported. For each Patient Derived Xenografts (PDXs) positivity (YES) or negativity (NO) to the engraftment and molecular subtype is reported.

|       | Patient    |           |         | PDXs        |         |
|-------|------------|-----------|---------|-------------|---------|
|       | Metastasis | Diagnosis | Subtype | Engraftment | Subtype |
| MBC4  | liver      | 2012      | LB      | YES         | LB      |
| MBC7  | liver      | 2012      | TN      | YES         | TN      |
| MBC12 | liver      | 2012      | LB      | NO          | -       |
| MBC14 | liver      | 2012      | HER2+   | NO          | -       |
| MBC18 | liver      | 2012      | LB      | YES         | LB      |
| MBC19 | liver      | 2012      | LB      | NO          | -       |
| MBC20 | liver      | 2012      | LB      | NO          | -       |
| MBC21 | liver      | 2012      | HER2+   | YES         | HER2+   |
| MBC22 | liver      | 2012      | LB      | YES         | LB      |
| MBC24 | liver      | 2012      | LB      | NO          | -       |
| MBC25 | liver      | 2012      | LB      | NO          | -       |
| MBC26 | liver      | 2012      | LB      | YES         | LB      |
| MBC28 | node       | 2012      | TN      | NO          | -       |
| MBC1  | lung       | 2013      | TN      | YES         | TN      |
| MBC2  | lung       | 2013      | TN      | YES         | TN      |
| MBC3  | lung       | 2013      | LB      | YES         | LB      |
| MBC16 | lung       | 2013      | LB      | NO          | -       |
| MBC5  | lung       | 2013      | LB      | YES         | LB      |
| MBC6  | lung       | 2013      | HER2+   | NO          | -       |
| MBC8  | node       | 2013      | LB      | NO          | -       |
| MBC9  | node       | 2013      | TN      | NO          | -       |
| MBC10 | lung       | 2014      | LB      | YES         | LB      |
| MBC11 | lung       | 2014      | LB      | YES         | LB      |

**Table S2. Genomic and transcriptomic profiles reveal high heterogeneity among PDXs** (see excel file). Exome sequencing analysis from 4 metastatic breast cancer Patient (PT) and corresponding Patient-derived xenograft (PDX) at different passages reveals high resemblance of mutational profile. Reference was obtained by normal blood samples. Chromosome (chr), start and end position, reference and alteration, variant allele frequency ( $>0.05$  at least in one sample), gene name and variants classification are reported. For Insertions or Deletions, presence (YES) or absence (NO) of alterations is indicated for each sample.

Exome sequencing analysis from 12 metastatic breast cancer PDXs reveals mutation profiles of breast cancer tumors (see excel file). Gene name, chromosome (chr), start and end position, reference and alteration, type of annotated mutation and protein change are reported for each PDX.

RNA-seq analysis of PDXs highlighted a different expression pattern in each PDX (see excel file). Differential expression analysis for 4 metastatic breast cancer PDXs with respect to the normal breast tissue (n=3 samples) is reported.  $FDR \leq 0.001$  and  $\log_2$  fold change (FC)  $\geq |2|$ .
