# Supplementary material for: Development of Personalized Therapeutic Strategies by Targeting Actionable Vulnerabilities in Metastatic and Chemotherapy-Resistant Breast Cancer PDXs
Source: MDPI journal article supplement (doi:10.3390/cells8060605), 2019-06-18
Supplement: s1 [file s1]

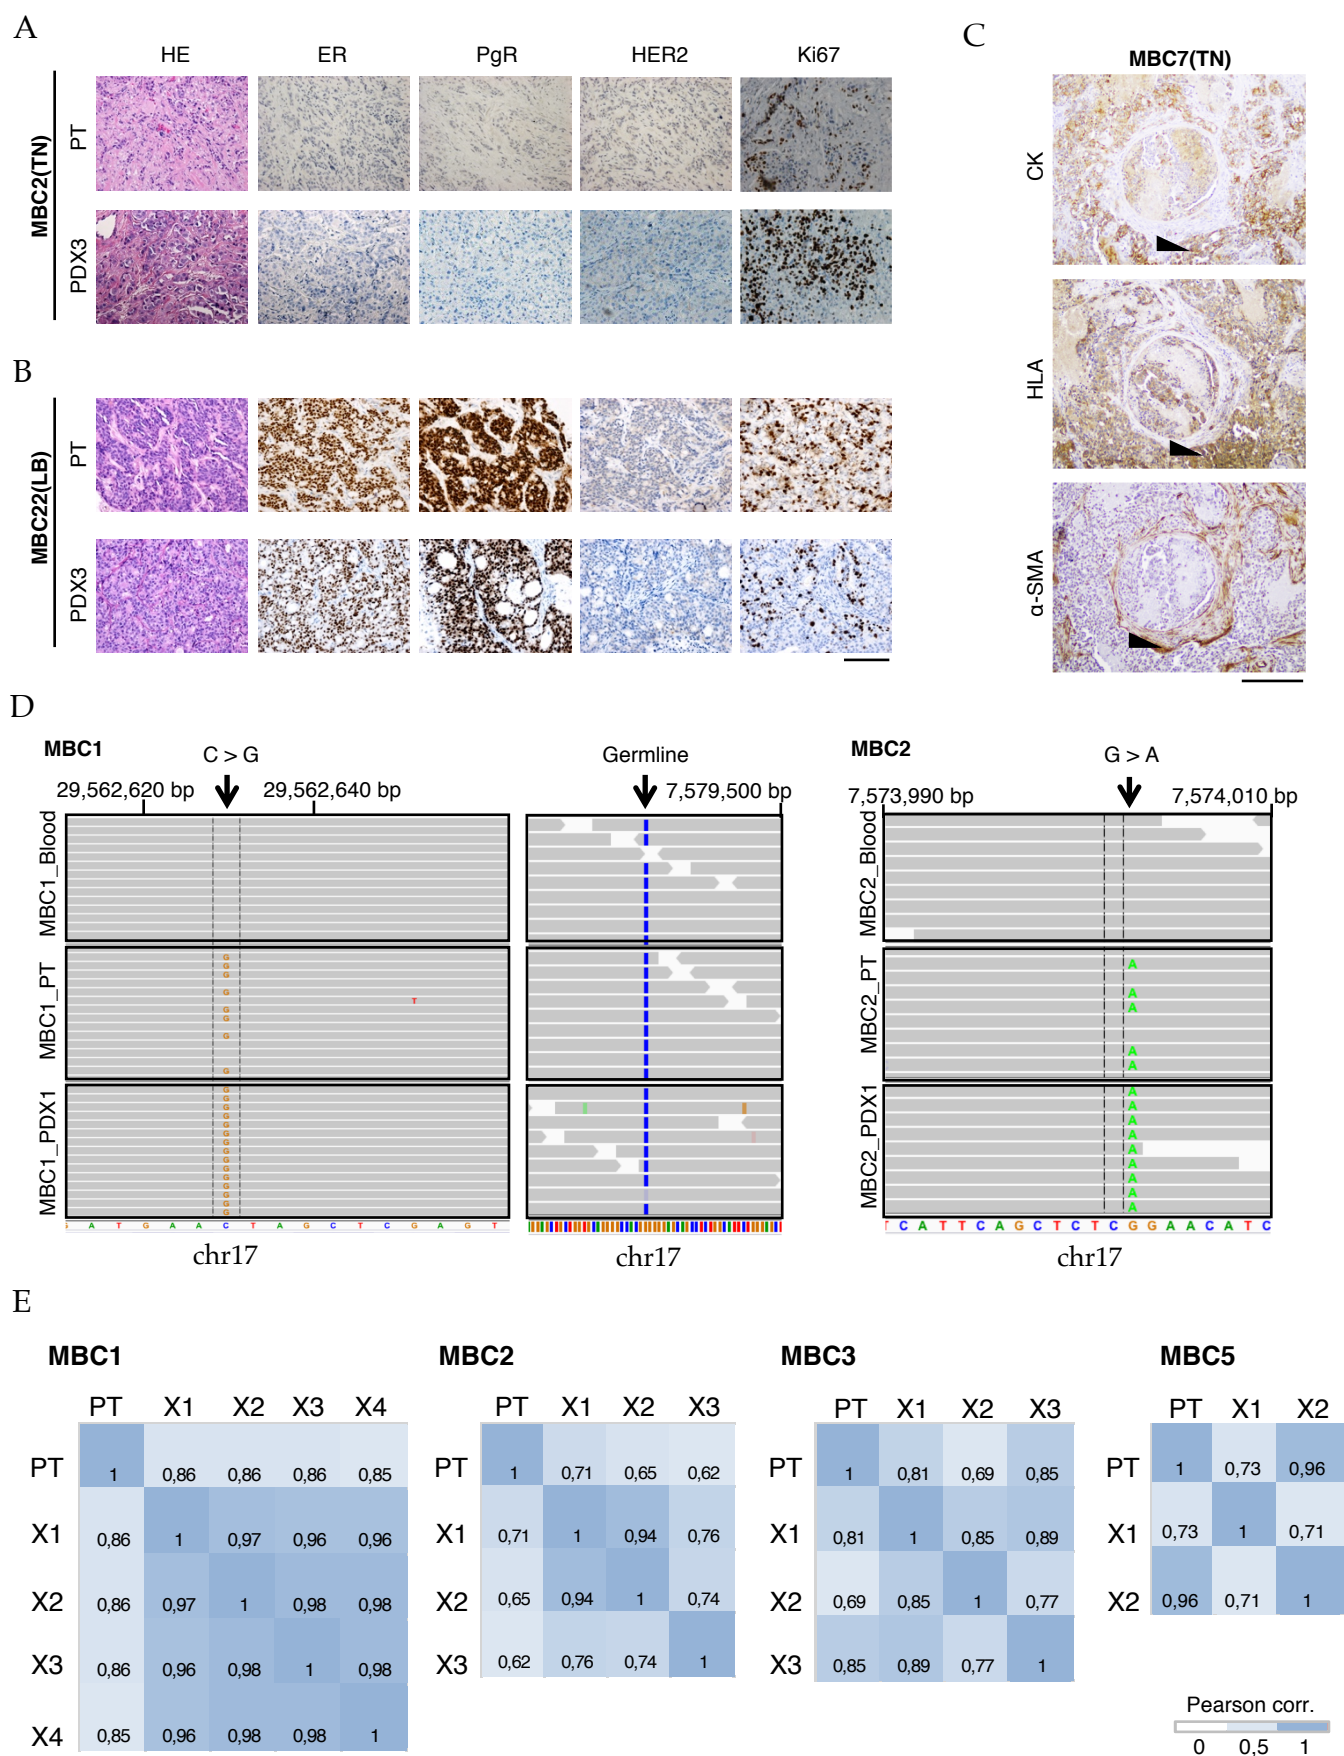

Supplementary Figure S1

**Figure S1. PDX recapitulates molecular patients' features. (A-B)** Representative histology by hematoxylin-eosin and immunoistochemistry (IHC) for estrogen (ER), progesterone (PgR), HER2 and Ki67 for one TN **(A)** and one LB **(B)** patient (PT) and the corresponding PDX at their third passage. Scale bar: 250  $\mu$ m. **(C)** IHC for cytokeratin, Human Leukocyte Antigen (HLA) and Alpha ( $\alpha$ -) Smooth Muscle Antibody (SMA) in one of the PDX. Scale bar: 50  $\mu$ m. **(D)** Representative snapshots visualized on IGV of chromosome (chr) 17 obtained from exome sequencing of blood (normal counterpart), tumors and PDXs derived from two PTs (MBC1 and MBC2). The sites of the somatic or germline mutations are indicated by the arrows. **(E)** Heatmaps represent Pearson correlation (r) of Variant Allele Frequency for PT and corresponding PDX at diverse passages in mice.

A

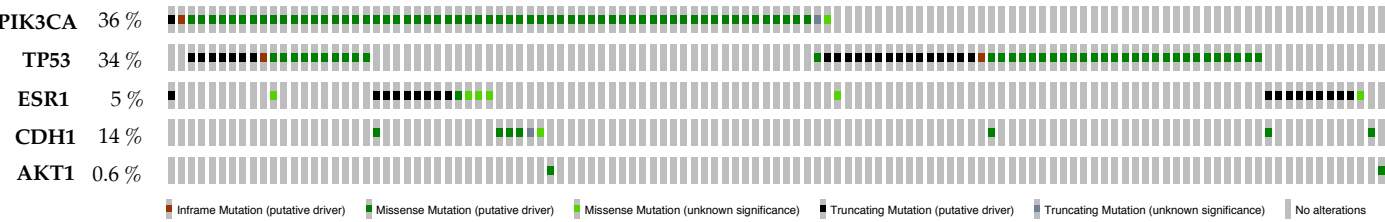

B

| Gene   | Sample | Chr   | Start_position | End_position | Ref | Alt    | Mutation          | Protein change | Clinical implication | Biological effect       |
|--------|--------|-------|----------------|--------------|-----|--------|-------------------|----------------|----------------------|-------------------------|
| TP53   | MBC7   | chr17 | 7578271        | 7578271      | T   | C      | Missense_Mutation | p.H193R        | Likely oncogenic     | Likely loss of function |
|        | MBC18  | chr17 | 7577574        | 7577574      | T   | C      | Missense_Mutation | p.Y236C        |                      |                         |
|        | MBC21  | chr17 | 7577088        | 7577088      | T   | A      | Missense_Mutation | p.T284S        | p.284_285insLP       | Likely loss of function |
|        | MBC21  | chr17 | 7577086        | 7577087      | -   | GGGAGA | Insertion         |                |                      |                         |
|        | MBC11  | chr17 | 7577094        | 7577094      | G   | A      | Missense_Mutation | p.R282W        |                      |                         |
|        | MBC5   | chr17 | 7577105        | 7577105      | G   | A      | Missense_Mutation | p.P278L        | Likely oncogenic     | Loss of function        |
|        | MBC2   | chr17 | 7574003        | 7574003      | G   | A      | Nonsense_Mutation | p.R342*        | Likely oncogenic     | Likely loss of function |
| PIK3CA | MBC7   | chr3  | 178952074      | 178952074    | G   | A      | Missense_Mutation | p.M1043I       | Oncogenic            | Gain of function        |
|        | MBC7   | chr3  | 178921549      | 178921549    | T   | A      | Missense_Mutation | p.V344E        |                      |                         |
|        | MBC22  | chr3  | 178948136      | 178948136    | G   | A      | Missense_Mutation | p.E970K        | Predicted oncogenic  | unknown                 |
|        | MBC22  | chr3  | 178952085      | 178952085    | A   | G      | Missense_Mutation | p.H1047R       | Oncogenic            | Gain of function        |
|        | MBC11  | chr3  | 178936082      | 178936082    | G   | A      | Missense_Mutation | p.E542K        | Oncogenic            | Gain of function        |
|        | MBC5   | chr3  | 178952084      | 178952084    | C   | T      | Missense_Mutation | p.H1047Y       | Oncogenic            | Gain of function        |
| ESR1   | MBC22  | chr6  | 152419923      | 152419923    | A   | C      | Missense_Mutation | p.Y537S        | Oncogenic            | Gain of function        |
| AKT1   | MBC7   | chr14 | 105239217      | 105239217    | C   | G      | Missense_Mutation | p.Q85H         |                      |                         |
| CDH1   | MBC7   | chr16 | 68842395       | 68842395     | G   | C      | Missense_Mutation | p.Q152H        |                      |                         |

C

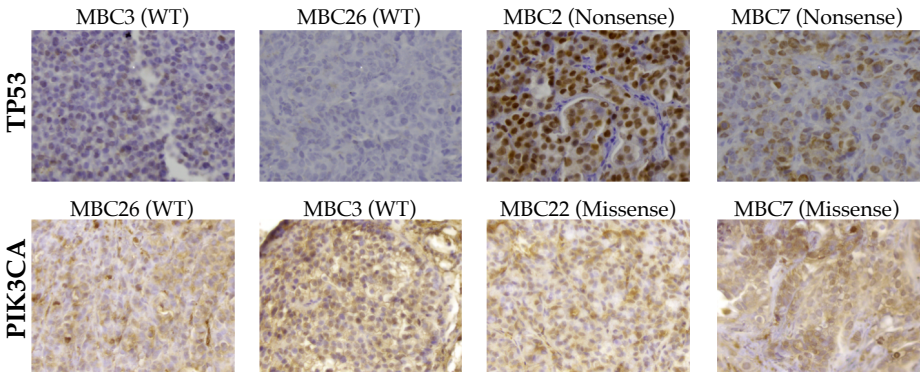

**Figure S2. Breast cancer PDXs recapitulate patients' genomic alterations.** **(A)** Genetic alterations of PIK3CA, TP53, ESR1, CDH1 and AKT1 in metastatic breast cancer patients registered in Metastatic Breast Cancer Project database (<http://www.cbioportal.org>). Percentage and kind of mutations are reported. **(B)** List of genetic alterations for aforementioned genes in each PDX. Gene, chromosome (chr), start and end position, annotated mutation and protein changes are reported. Clinical implications and biological effects (if available) of each alteration with respect to specific protein changes are reported as in cbioportal.org. **(C)** IHC evaluation of TP53 and PIK3CA protein expression in some of the PDXs is reported. Counterstain was performed by haematoxylin. Scale bar: 50  $\mu$ m.

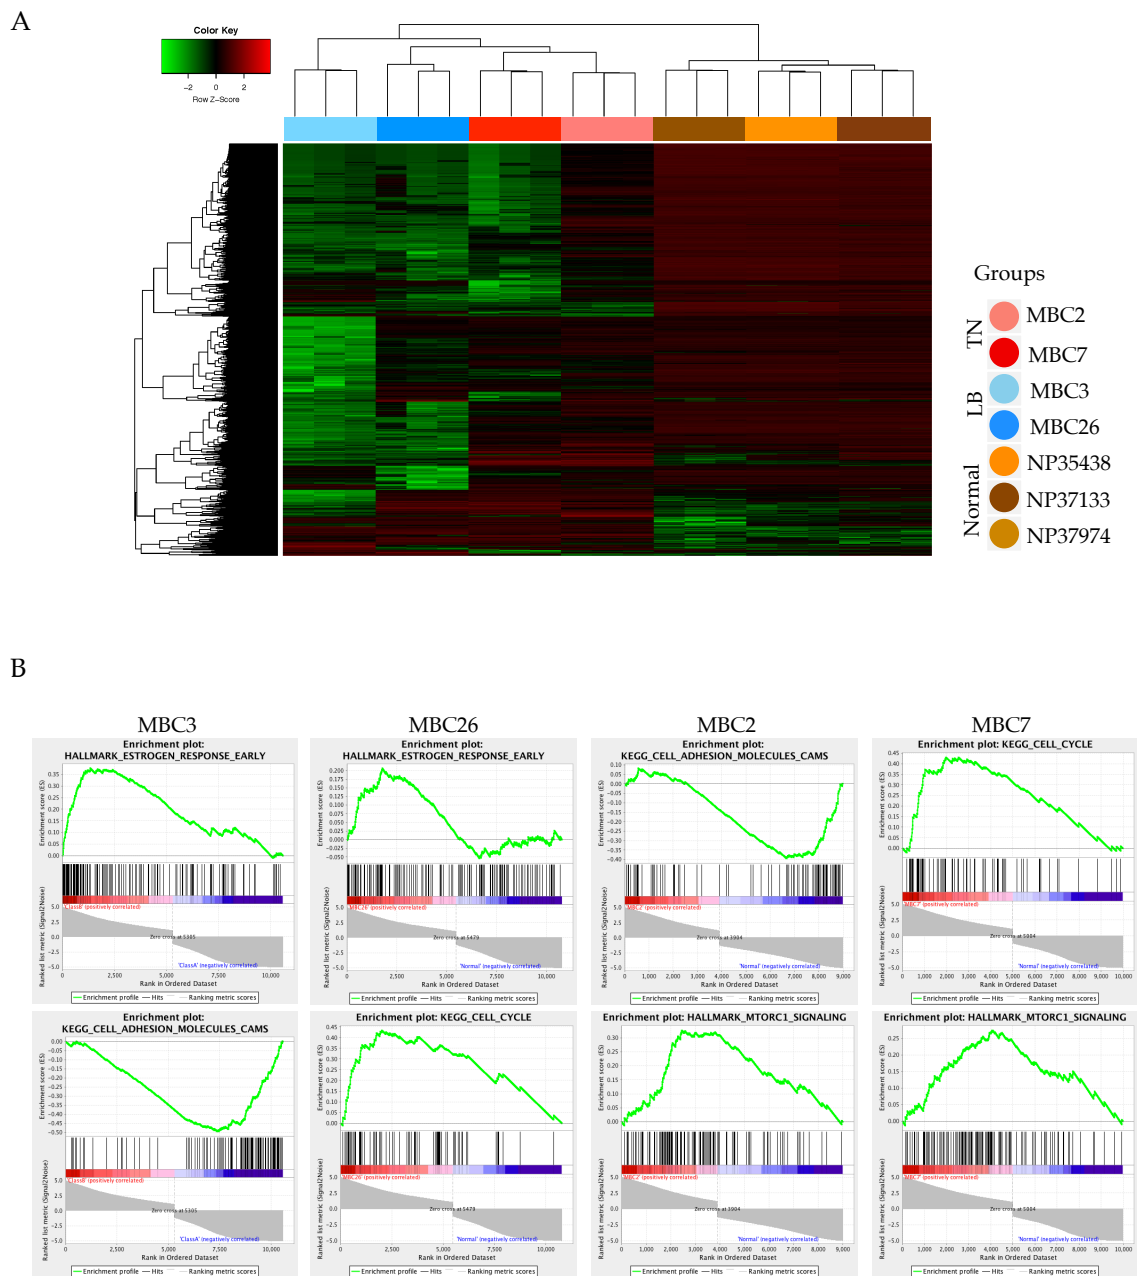

**Figure S3. Activation of oncogenic pathways is revealed by transcriptomic profile in PDXs. (A)** Hierarchical clustering of 1869 most variable genes in 3 Normal breast, 2 LB and 2 TN breast cancer PDXs (n=3 replicates). **(B)** Enrichment plots for some representative functions in PDXs by Gene Set Enrichment Analysis (GSEA) are reported.

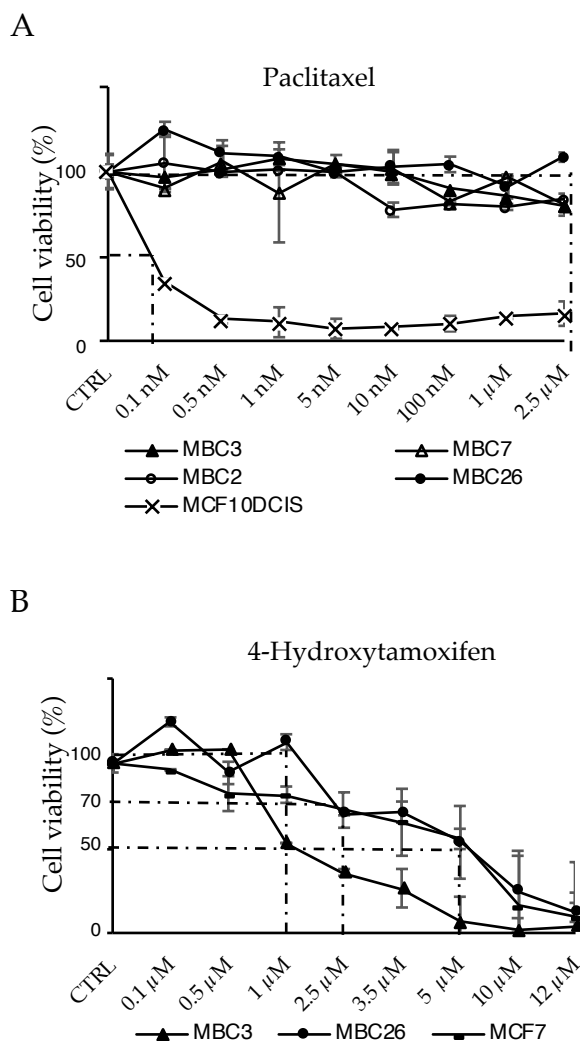

**Figure S4. Response of PDX cells to standard drugs administration parallels patients' sensitivity.** Effects on *in vitro* cells viability (expressed as %) due to standard therapies is reported for each PDX. **(A)** Paclitaxel (PTX) was tested in 2 TN (MBC2 and MBC7) and 2 LB (MBC3 and MBC26) PDXs (n=3; mean  $\pm$  SD). **(B)** 4-Hydroxytamoxifen (4-OHT) treatment at increasing concentrations was tested in 2 LB (MBC3 and MBC26) PDX cells (n=3; mean  $\pm$  SD). MCF10DCIS cell line was used as positive control for PTX treatment; MCF-7 as positive control for 4-OHT treatment. Dotted lines represent IC<sub>30</sub> (70% viability), IC<sub>50</sub> (50% viability) or no effect (100% viability).

A

|       | STANDARD |                 | ALTERNATIVE      |                  | COMBINATORIAL (PTX) |          | COMBINATORIAL (TAM) |            |
|-------|----------|-----------------|------------------|------------------|---------------------|----------|---------------------|------------|
|       | PTX      | 4-OHT           | IDAS             | EVER             | PTX+IDAS            | PTX+EVER | 4-OHT+IDAS          | 4-OHT+EVER |
| MBC2  | R        | -               | R                | IC50: 10 $\mu$ M | P<0.05              | P<0.001  | -                   | -          |
| MBC7  | R        | -               | R                | IC30: 10 $\mu$ M | P<0.001             | P<0.001  | -                   | -          |
| MBC3  | R        | IC50: 1 $\mu$ M | IC30: 15 $\mu$ M | IC50: 20 $\mu$ M | P<0.001             | P<0.001  | NS                  | P=0.0578   |
| MBC26 | R        | IC50: 5 $\mu$ M | IC30: 15 $\mu$ M | IC50: 15 $\mu$ M | P<0.001             | P<0.001  | P<0.05              | P<0.05     |

B

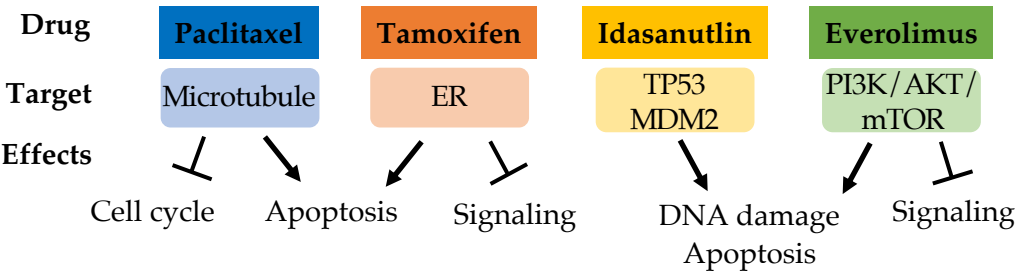

C

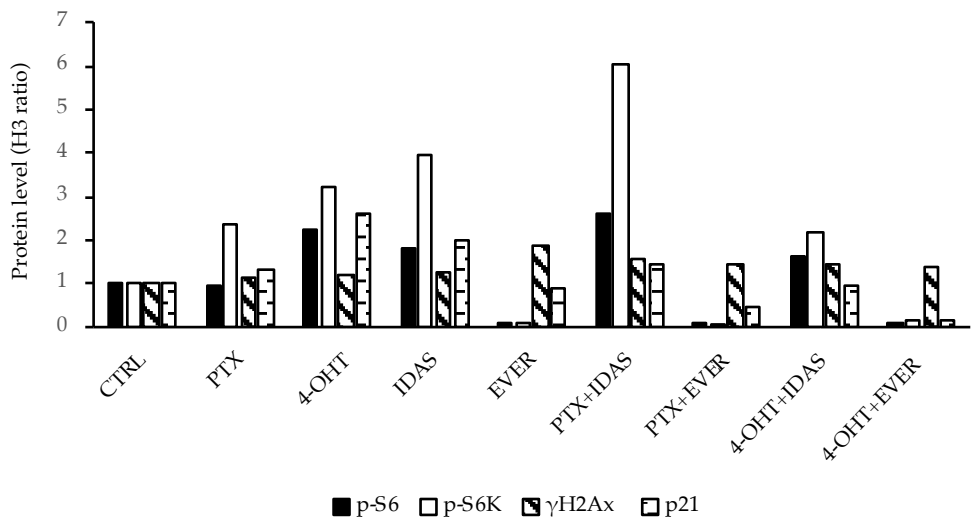

**Figure S5. Response of PDX cells to drug administration resembles specific drug effects.** (A) Table summarizes resistance (R) or response with respect to IC30 or IC50 values for standard (Paclitaxel – PTX- or 4-Hydroxytamoxifen – 4-OHT) or alternative (Idasanutlin – IDAS - or Everolimus - EVER) therapies. P values of significant differences of cell viability among standard and combinatorial (standard + alternative) drugs administration were calculated by one-way ANOVA followed by Dunnett Post test. NS: not significant. (B) Scheme represents targets and biological effects reported for each drug administration. (C) Protein levels of mTOR1 target – phospho-S6(p-S6) and phospho-S6K (p-S6K), γH2Ax and p21 in response to aforementioned treatments, were quantified with respect to H3 as normalizer, relatively to the control (CTRL - no treatment).
